# Supplementary material
Source: PubMed Central journal article supplement (PMC3159525)
Supplement: supp_tpc.111.084988_Reddy-SupplementalData.pdf [file supp_tpc.111.084988_Reddy-SupplementalData.pdf]

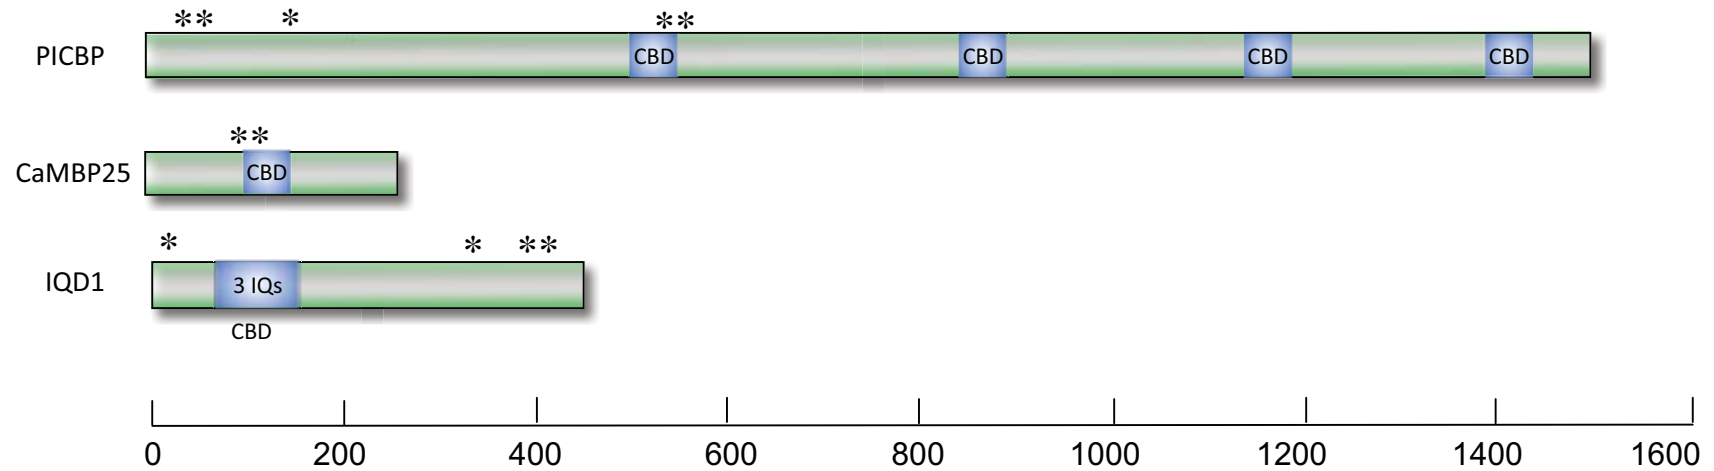

**Supplemental Figure 1.** Schematic diagram of two nuclear CaM-binding proteins implicated in biotic (PICBP, IQD1) and abiotic stress (CaMBP25). CBD, CaM-binding domain; IQ, IQ motif. Stars indicate nuclear localization signals. All proteins are drawn to scale. Numbers on the scale indicate the length of the protein.

**Supplemental Table 1. CaM-binding transcription factors in Arabidopsis.**

| AT#       | Name      | Description                      | Binds CaM/CML* | Reference                                                           |
|-----------|-----------|----------------------------------|----------------|---------------------------------------------------------------------|
| AT1G48150 |           | MADS-box family protein          | M              | (Popescu et al., 2007)                                              |
| AT5G06500 |           | MADS-box family protein          | M              | (Popescu et al., 2007)                                              |
| AT5G26950 |           | MADS-box family protein          | M              | (Popescu et al., 2007)                                              |
| AT2G03710 | AGL3      | MADS-box family protein          | M              | (Popescu et al., 2007)                                              |
| AT5G38740 |           | MADS-box family protein          | M              | (Popescu et al., 2007)                                              |
| AT1G65300 | AGL3      | MADS-box family protein          | M              | (Popescu et al., 2007)                                              |
| AT5G26870 |           | MADS-box family protein          | M              | (Popescu et al., 2007)                                              |
| AT5G55690 |           | MADS-box family protein          | M              | (Popescu et al., 2007)                                              |
| AT1G60920 |           | MADS-box family protein          | M              | (Popescu et al., 2007)                                              |
| AT3G04100 |           | MADS-box family protein          | M              | (Popescu et al., 2007)                                              |
| AT5G60910 | AGL8      | MADS-box family protein          | M              | (Popescu et al., 2007)                                              |
| AT3G30260 |           | MADS-box family protein          | M              | (Popescu et al., 2007)                                              |
| AT4G37940 |           | MADS-box family protein          | M              | (Popescu et al., 2007)                                              |
| AT5G13790 | AGL15     | MADS-box family protein          | M              | (Popescu et al., 2007)                                              |
| AT5G23260 |           | MADS-box family protein          | M              | (Popescu et al., 2007)                                              |
| AT5G27050 |           | MADS-box family protein          | M              | (Popescu et al., 2007)                                              |
| AT5G40120 | AGL86     | MADS-box family protein          | M              | (Popescu et al., 2007)                                              |
| AT5G41200 |           | MADS-box family protein          | M              | (Popescu et al., 2007)                                              |
| AT5G49490 |           | MADS-box family protein          | M              | (Popescu et al., 2007)                                              |
| AT1G60040 |           | MADS-box family protein          | M              | (Popescu et al., 2007)                                              |
| AT2G24840 |           | MADS-box family protein          | M              | (Popescu et al., 2007)                                              |
| AT3G58780 | AGL1,SHP1 | MADS-box family protein          | M              | (Popescu et al., 2007)                                              |
| AT5G27070 | AGL53     | MADS-box family protein          | M              | (Popescu et al., 2007)                                              |
| AT5G39810 |           | MADS-box family protein          | M              | (Popescu et al., 2007)                                              |
| AT5G48670 |           | MADS-box family protein          | M              | (Popescu et al., 2007)                                              |
| AT1G22070 | TGA3      | bZIP transcription factor family | Y,M            | (Reddy et al., 2002; Popescu et al., 2007; Szymanski, et al., 1996) |
| At1g77920 | TGA-like  | bZIP transcription factor family | PH             | (Reddy et al., 2002)                                                |

|           |           |                                  |     |                        |
|-----------|-----------|----------------------------------|-----|------------------------|
| At5g10030 | TGA-like  | bZIP transcription factor family | PH  | (Reddy et al., 2002)   |
| At5g65210 | TGA-like  | bZIP transcription factor family | PH  | (Reddy et al., 2002)   |
| AT3G12250 | TGA6      | bZIP transcription factor family | M   | (Popescu et al., 2007) |
| AT5G08141 |           | bZIP transcription factor family | M   | (Popescu et al., 2007) |
| AT5G10030 | TGA4      | bZIP transcription factor family | M   | (Popescu et al., 2007) |
| AT4G36730 | GBF1      | bZIP; G-box binding factor 1     | M   | (Popescu et al., 2007) |
| AT3G30530 |           | bZIP transcription factor family | M   | (Popescu et al., 2007) |
| AT4G18650 | TGA2.1    | bZIP transcription factor family | M   | (Popescu et al., 2007) |
| AT5G24800 | BZO2H2    | bZIP transcription factor family | M   | (Popescu et al., 2007) |
| AT3G62420 |           | bZIP transcription factor family | M   | (Popescu et al., 2007) |
| AT5G49450 |           | bZIP transcription factor family | M   | (Popescu et al., 2007) |
| AT1G08320 |           | bZIP transcription factor family | M   | (Popescu et al., 2007) |
| AT1G59530 |           | bZIP transcription factor family | M   | (Popescu et al., 2007) |
| AT3G58120 |           | bZIP transcription factor family | M   | (Popescu et al., 2007) |
| AT5G38800 |           | bZIP transcription factor family | M   | (Popescu et al., 2007) |
| AT1G58110 |           | bZIP transcription factor family | M   | (Popescu et al., 2007) |
| AT3G19290 | ABF2      | bZIP transcription factor family | M   | (Popescu et al., 2007) |
| AT4G02640 | BZO2H1    | bZIP transcription factor family | M   | (Popescu et al., 2007) |
| AT5G15830 |           | bZIP transcription factor family | M   | (Popescu et al., 2007) |
| AT1G06910 | TRF-like7 | MYB family transcription factor  | M   | (Popescu et al., 2007) |
| AT3G12720 |           | MYB family transcription factor  | M   | (Popescu et al., 2007) |
| AT2G23290 | MYB70     | MYB family transcription factor  | M   | (Popescu et al., 2007) |
| AT2G31180 | MYB14     | MYB family transcription factor  | M   | (Popescu et al., 2007) |
| AT2g47190 | MYB2      | MYB family transcription factor  | Y   | (Yoo et al., 2005)     |
| AT4G37240 |           | MYB family transcription factor  | M   | (Popescu et al., 2007) |
| AT2G30590 | WRKY21    | WRKY Transcription Factor        | Y,M | (Popescu et al., 2007) |
| AT5G26170 | WRKY50    | WRKY Transcription Factor        | M   | (Popescu et al., 2007) |
| AT3G01970 | WRKY45    | WRKY Transcription Factor        | M   | (Popescu et al., 2007) |
| AT2G46130 | WRKY43    | WRKY Transcription Factor        | Y,M | (Popescu et al., 2007) |
| AT4G23810 | WRKY53    | WRKY Transcription Factor        | Y,M | (Popescu et al., 2007) |
| At2g30590 | WRKY 21   | WRKY Transcription Factor        | Y   | (Park et al., 2005)    |

|           |            |                                                                          |     |                                                                                           |
|-----------|------------|--------------------------------------------------------------------------|-----|-------------------------------------------------------------------------------------------|
| At4g31550 | WRKY11     | WRKY Transcription Factor                                                | Y   | (Park et al., 2005)                                                                       |
| At2g23320 | WRKY15     | WRKY Transcription Factor                                                | Y   | (Park et al., 2005)                                                                       |
| At2g24570 | WRKY17     | WRKY Transcription Factor                                                | Y   | (Park et al., 2005)                                                                       |
| At3g04670 | WRKY39     | WRKY Transcription Factor                                                | Y   | (Park et al., 2005)                                                                       |
| At4g24240 | WRKY7      | WRKY Transcription Factor                                                | Y   | (Park et al., 2005)                                                                       |
| At5g28650 | WRKY74     | WRKY Transcription Factor                                                | Y   | (Park et al., 2005)                                                                       |
| At5g09410 | CAMTA1     | Transcription factors, Binds V-PPase promoter                            | Y   | (Reddy et al., 2000; Yang and Poovaiah, 2002b; Mitsuda et al., 2003; Bouche et al., 2005) |
| At5g64220 | CAMTA2     | Transcription factors                                                    | Y   | (Reddy et al., 2000; Yang and Poovaiah, 2002b; Mitsuda et al., 2003; Bouche et al., 2005) |
| At2g22300 | CAMTA3     | Transcription factors, Disease resis, growth; binds <i>EDS1</i> promoter | Y   | (Reddy et al., 2000; Yang and Poovaiah, 2002b; Mitsuda et al., 2003; Bouche et al., 2005) |
| At1g67310 | CAMTA4     | Transcription factors                                                    | Y   | (Reddy et al., 2000; Yang and Poovaiah, 2002b; Mitsuda et al., 2003; Bouche et al., 2005) |
| At4g16150 | CAMTA5     | Transcription factors, Binds V-PPase promoter                            | Y   | (Reddy et al., 2000; Yang and Poovaiah, 2002b; Mitsuda et al., 2003; Bouche et al., 2005) |
| At3g16940 | CAMTA6     | Transcription factors                                                    | Y   | (Reddy et al., 2000; Yang and Poovaiah, 2002b; Mitsuda et al., 2003; Bouche et al., 2005) |
| AT1G07530 | SCL14      | Scarecrow-like transcription factor                                      | M   | (Popescu et al., 2007)                                                                    |
| AT5G66770 | SCL4       | Scarecrow transcription factor                                           | M   | (Popescu et al., 2007)                                                                    |
| AT2G04890 | SCL21      | Scarecrow-like transcription factor                                      | M   | (Popescu et al., 2007)                                                                    |
| AT5G41920 | SCL23      | Scarecrow transcription factor                                           | M   | (Popescu et al., 2007)                                                                    |
| AT5G46590 |            | No apical meristem (NAM) protein                                         | M   | (Popescu et al., 2007)                                                                    |
| AT3G04430 |            | No apical meristem (NAM) protein                                         | M   | (Popescu et al., 2007)                                                                    |
| AT3G17600 | IAA31      | AUX/IAA transcription factor family                                      | Y,M | (Popescu et al., 2007)                                                                    |
| At5g63160 | AtBT1 (BTB | Transcription regulation, abiotic stress                                 | Y   | (Du and Poovaiah, 2004)                                                                   |

|           |               |                                                             |    |                                                            |
|-----------|---------------|-------------------------------------------------------------|----|------------------------------------------------------------|
|           | and TAZ)      |                                                             |    |                                                            |
| At3g48360 | AtBT2         | Transcription regulation, abiotic stress                    | Y  | (Du and Poovaiah, 2004)                                    |
| At1g05690 | AtBT3         | Transcription regulation, abiotic stress                    | Y  | (Du and Poovaiah, 2004)                                    |
| At5g67480 | AtBT4         | Transcription regulation, abiotic stress                    | Y  | (Du and Poovaiah, 2004)                                    |
| At4g37610 | AtBT5         | Transcription regulation, abiotic stress                    | Y  | (Du and Poovaiah, 2004)                                    |
| At4g35580 | CBNAC         | Transcriptional repressor                                   | Y  | (Kim et al., 2007)                                         |
| At1g33240 | AtGTL         | Transcription repressor functions in drought                | Y  | (Yoo et al., 2007)                                         |
| At5g62570 | ACBP60-like.a | Heat stress                                                 | Y  | (Reddy et al., 2002; Wang et al 2009a; Zhang et al., 2010) |
| At5g57580 | ACBP60-like.b | Heat stress                                                 | Y  | (Reddy et al., 2002; Wang et al 2009a; Zhang et al., 2010) |
| At2g18750 | ACBP60-like.c | Heat stress                                                 | Y  | (Reddy et al., 2002; Wang et al 2009a; Zhang et al., 2010) |
| At4g25800 | ACBP60-like.d | Heat stress                                                 | Y  | (Reddy et al., 2002; Wang et al 2009a; Zhang et al., 2010) |
| At2g24300 | ACBP60-like.e | Heat stress                                                 | Y  | (Reddy et al., 2002; Wang et al 2009a; Zhang et al., 2010) |
| At4g31000 | ACBP60-like.f | Heat stress                                                 | PH | (Reddy et al., 2002; Wang et al 2009a; Zhang et al., 2010) |
| At5g26920 | ACBP60-like.g | Heat stress; disease resistance; binds <i>ICS1</i> promoter | PH | (Reddy et al., 2002; Wang et al 2009a; Zhang et al., 2010) |

\*Y, verified binding to CaM/CML; PH, homology to plant proteins that binds CaM/CML; M, binds CaM/CML in microarray (Popescu, 2007).
